# Supplementary material
Source: Royal Society of Chemistry journal article supplement (https://www.rsc.org/suppdata/cc/1999/2007/905940g.doc)
Supplement: Supplementary file 1 [file 905940g.doc]

**Supplementary Data**

Hydrogen bonding and cooperativity effects on the assembly of alkyl- and perfluoroalkyl-sulfonyl naphthols: FF non-bonded interactions

**Janusz Kowalik,* Donald VanDerveer, Caroline Clower and Laren M. Tolbert**

School of Chemistry and Biochemistry, Georgia Institute of Technology, Atlanta, GA 30332-0400, USA.

E-mail: janusz.kowalik@chemistry.gatech.edu


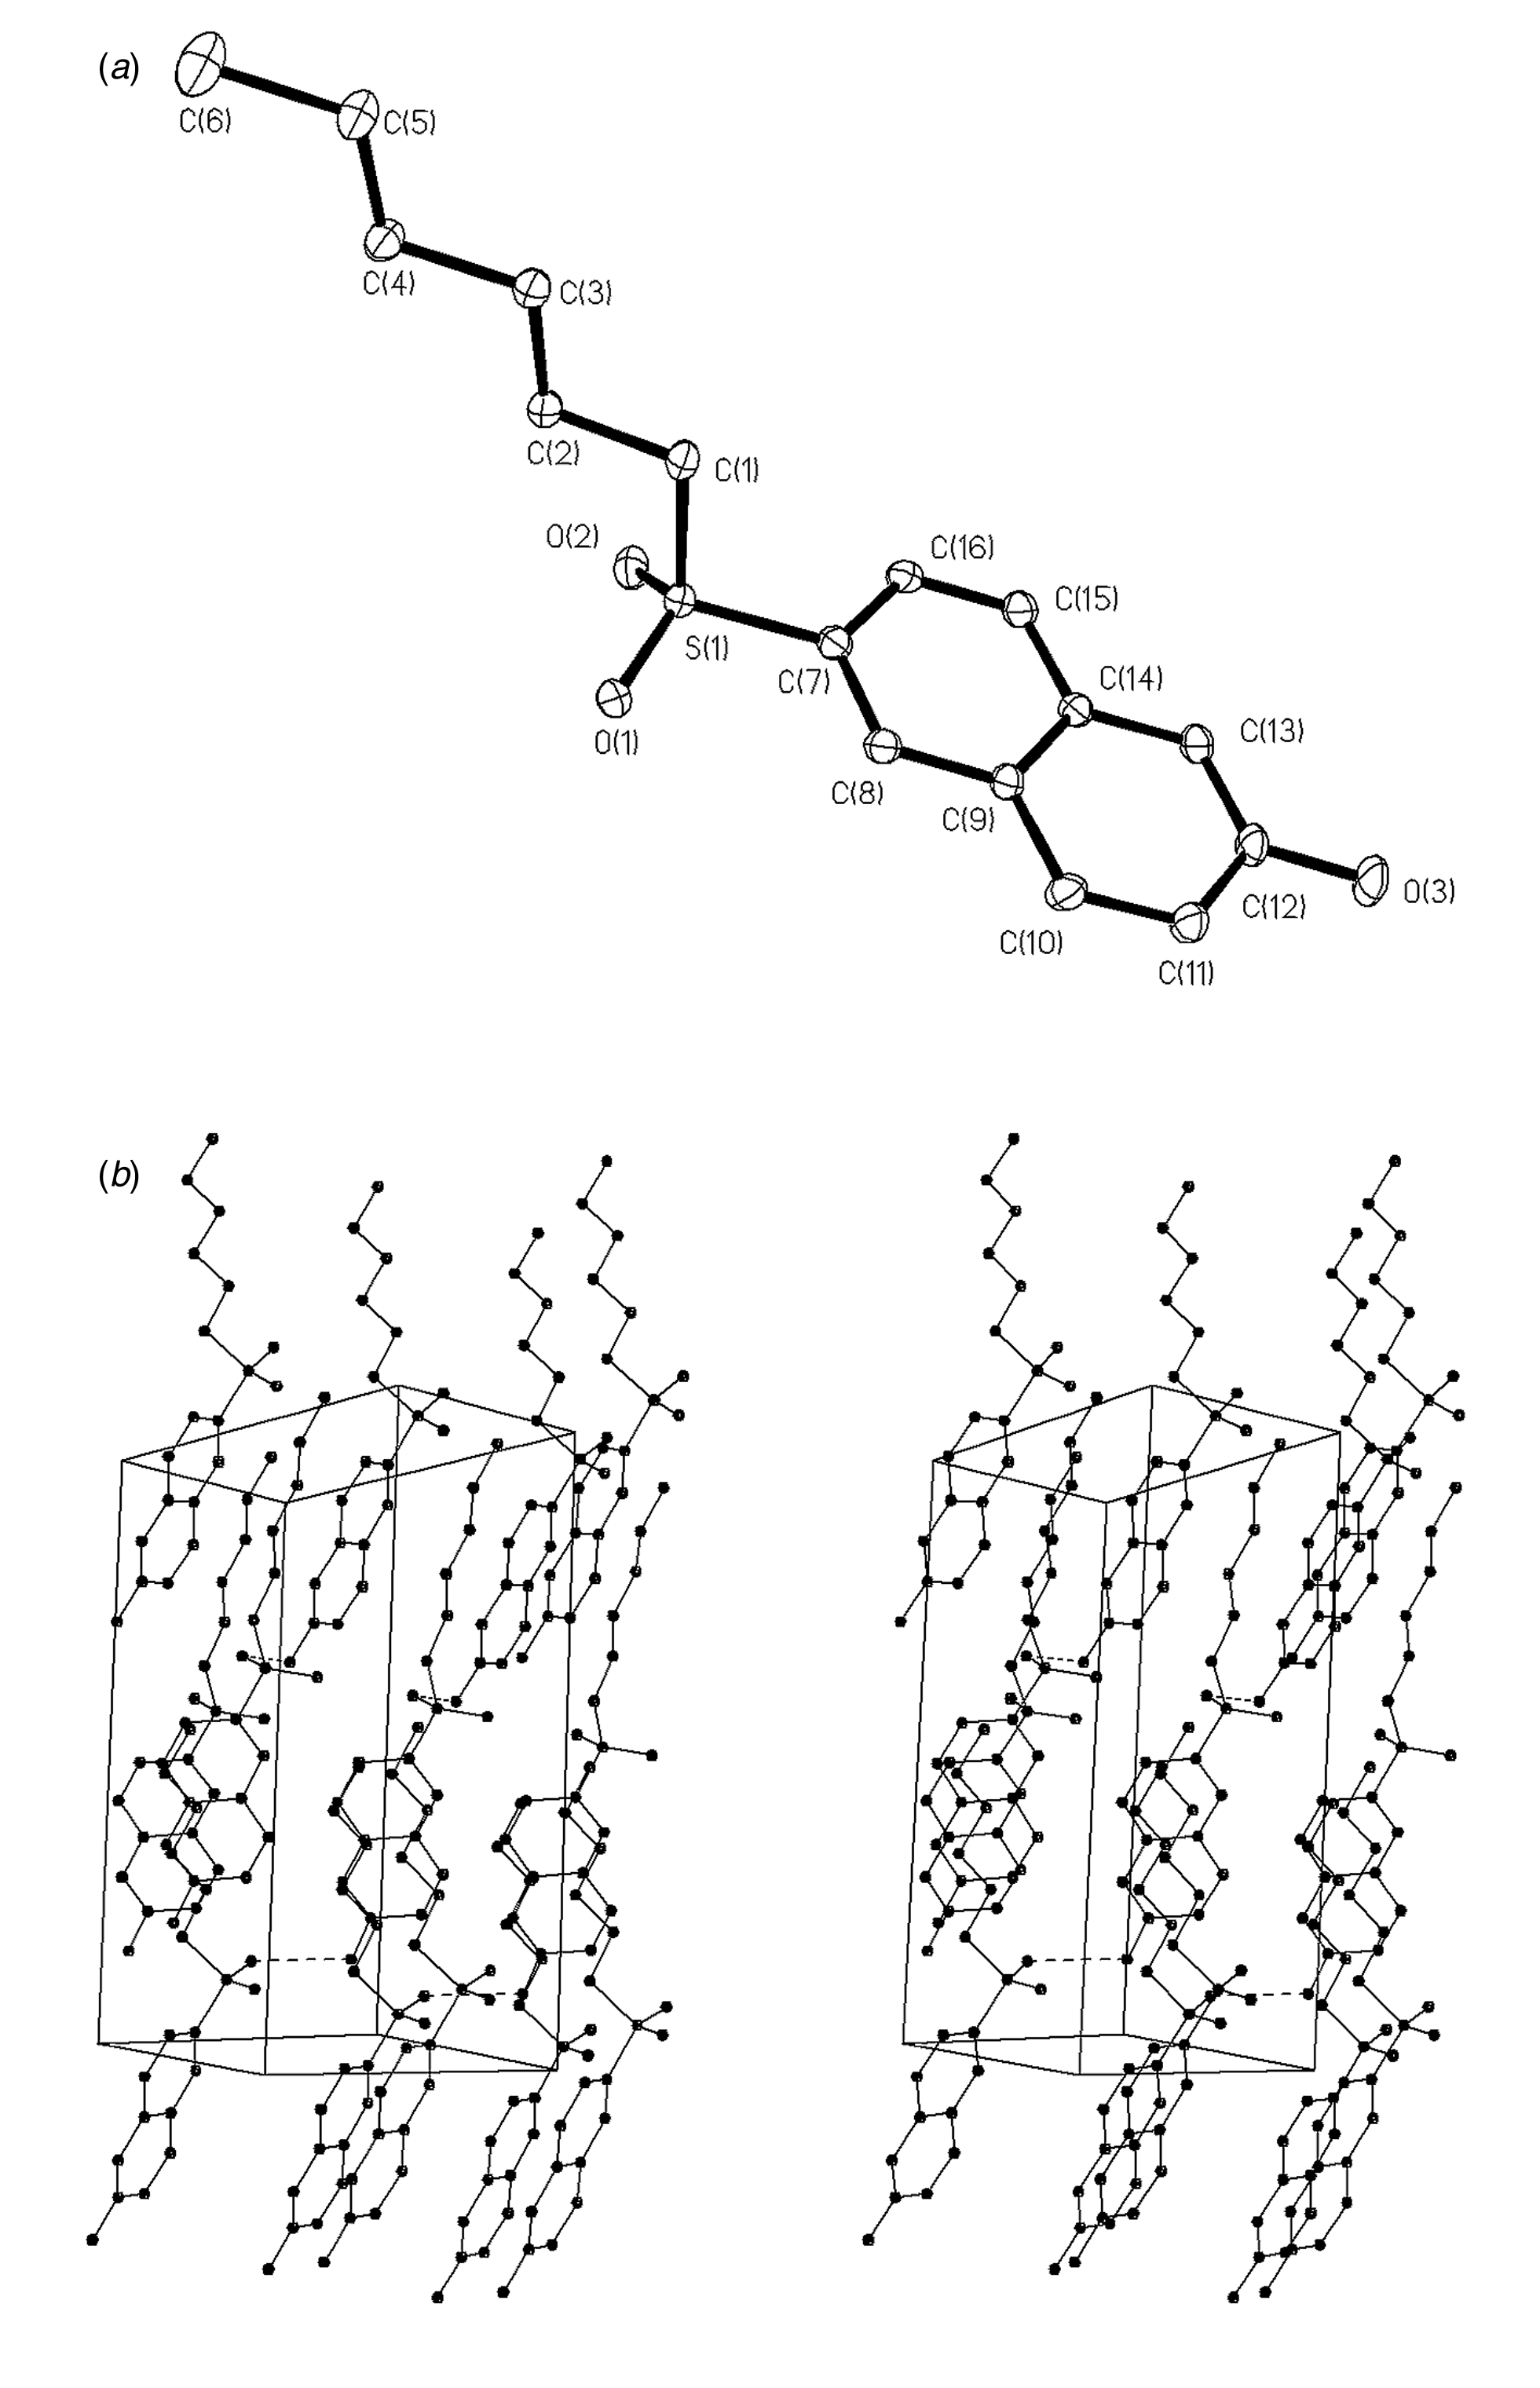


**Fig. 1** (*a*) Atom numbering and (*b*) stereoview of the crystal packing of **1**. For clarity, hydrogen atoms are omitted. The hydrogen bonds are specified by dotted lines.


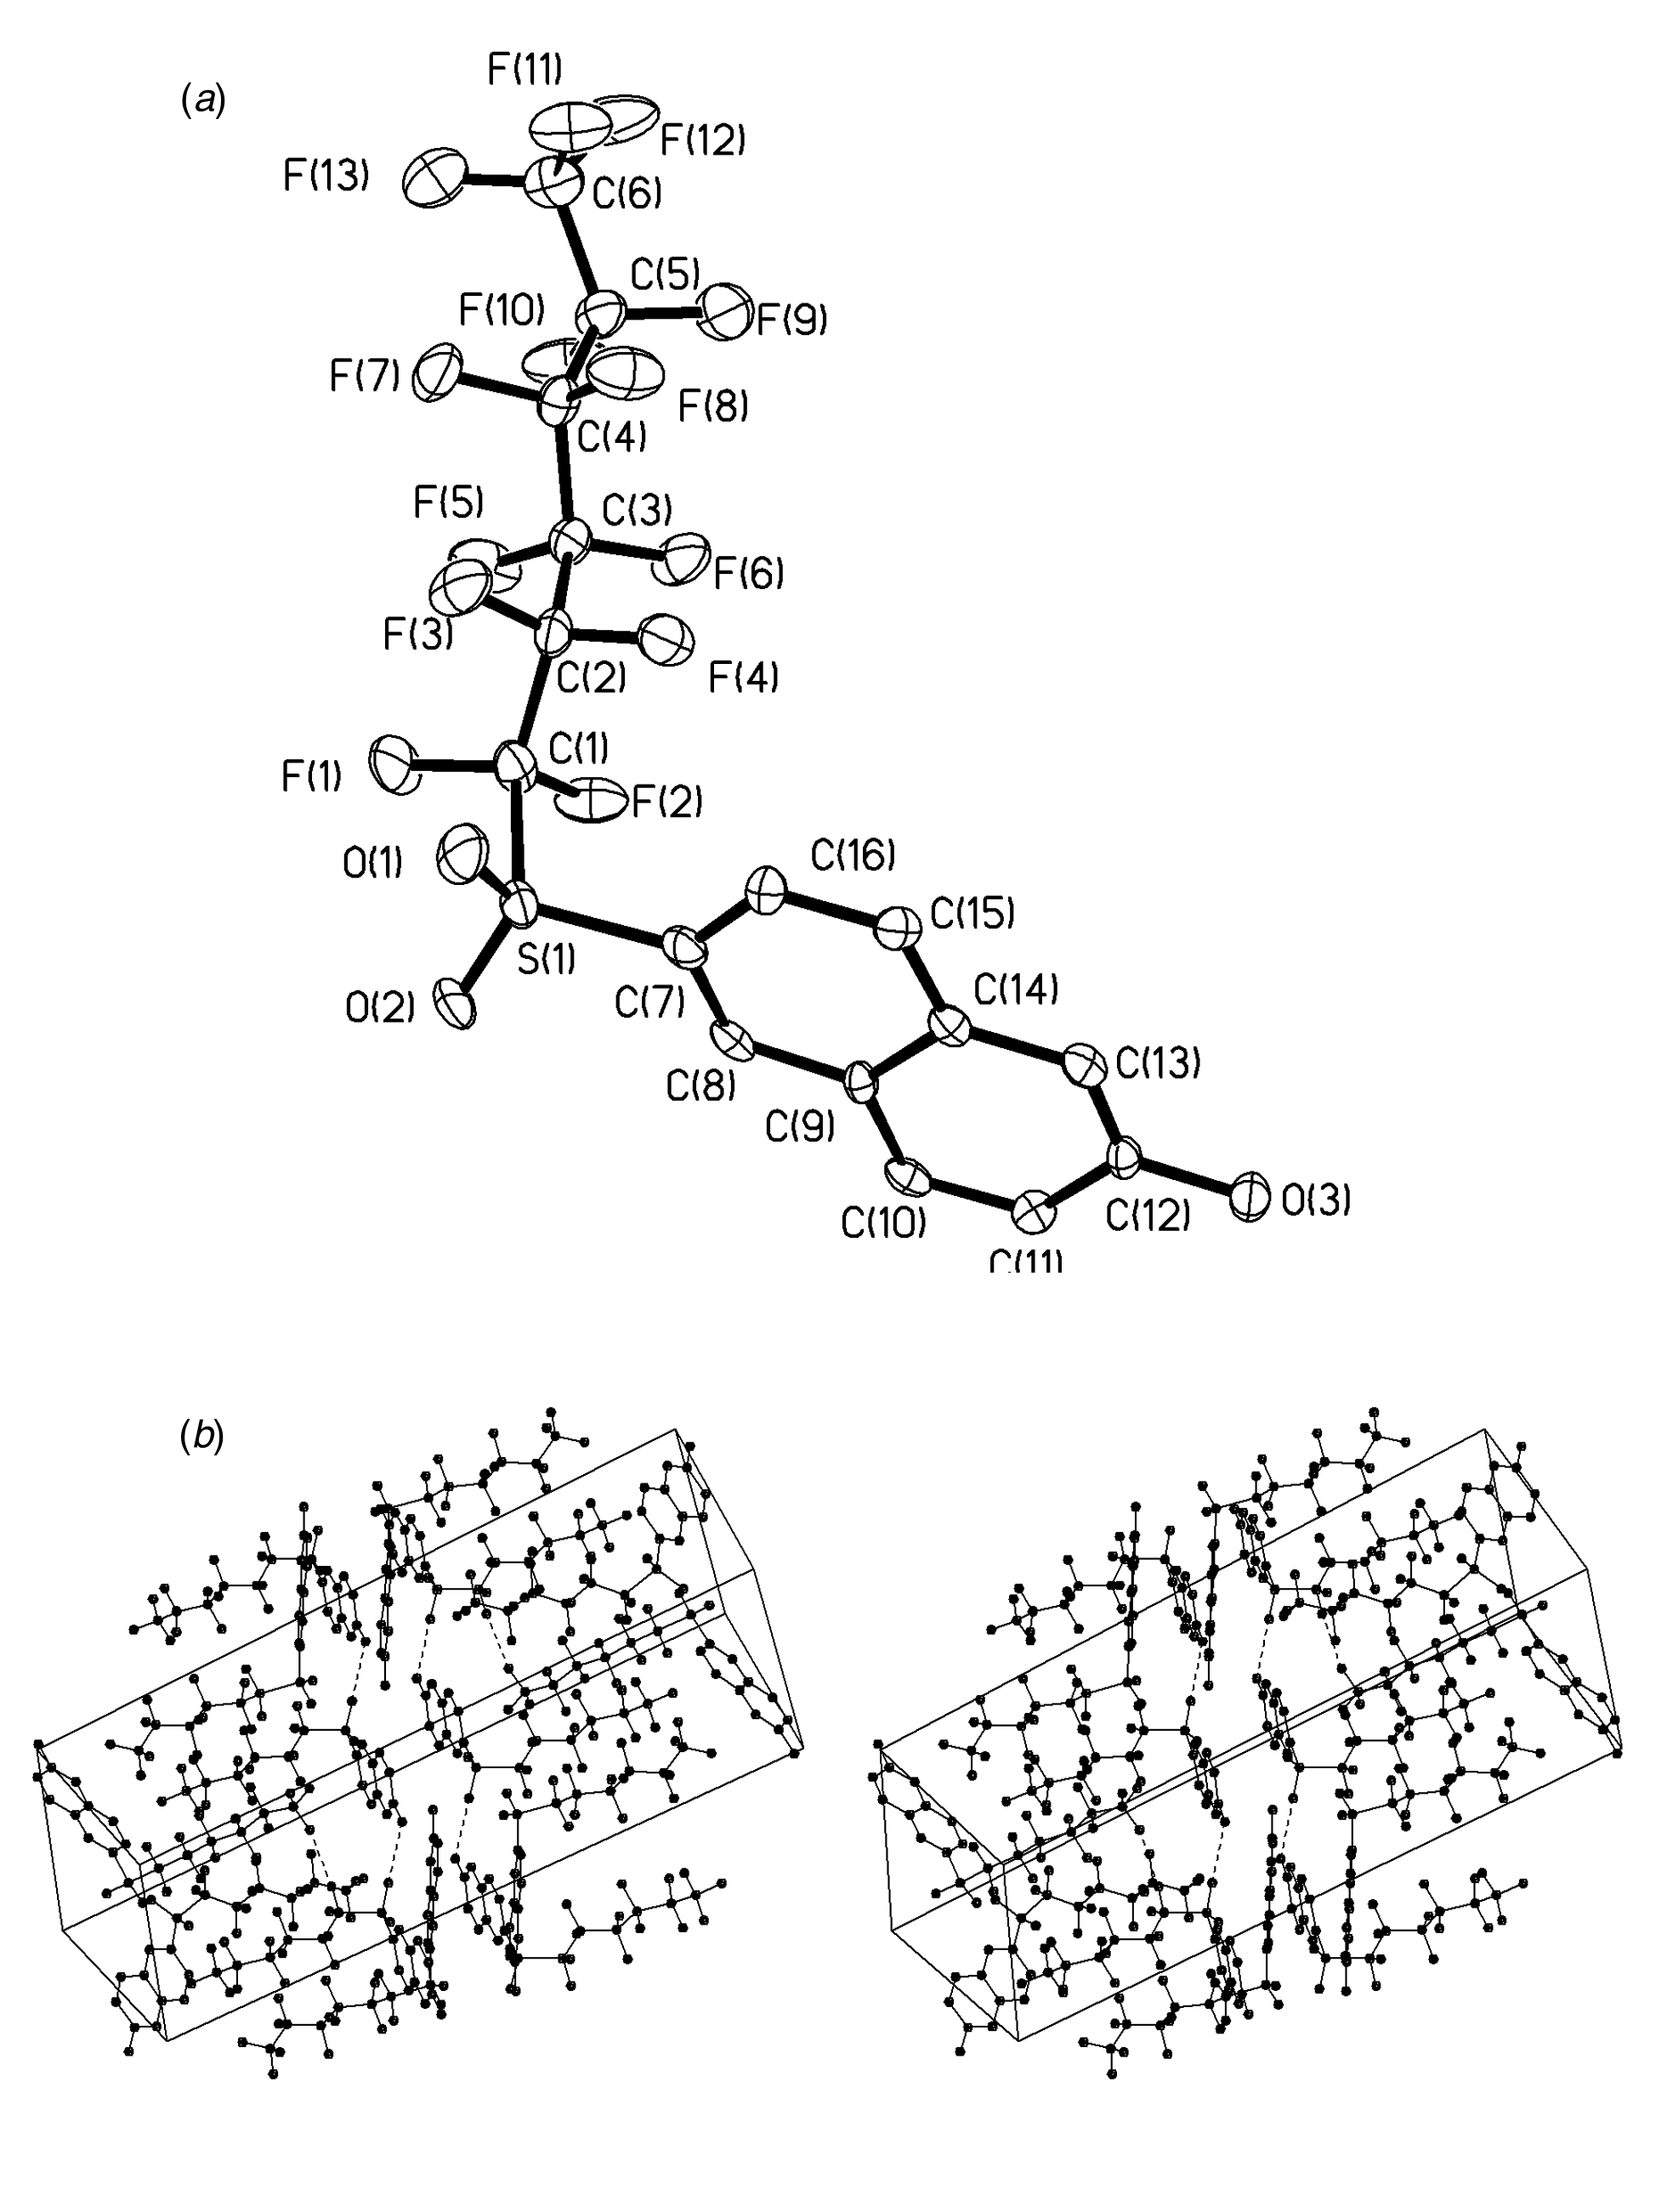


**Fig. 2** (*a*) Atom numbering and (*b*) stereoview of the crystal packing of **1F**. For clarity, hydrogen atoms are omitted. The hydrogen bonds and F···F non-bonded interactions are specified by dotted lines.
